# Supplementary material
Source: MDPI journal article supplement (https://www.mdpi.com/1999-4907/13/2/277)
Supplement: s1 [file s1]

Figure S1. Photographs of study species in the experiment.

| Scientific name                                                                                                                         | Photo                                                                                                                        |
|-----------------------------------------------------------------------------------------------------------------------------------------|------------------------------------------------------------------------------------------------------------------------------|
| <i>Erythrospermum monticolum</i> Thouars var. <i>monticolum</i> (Achariaceae) <ul style="list-style-type: none"><li>• Endemic</li></ul> |  <p>(Photo credit: Pritesh Chooramun)</p> |
| <i>Ochna mauritiana</i> Lam. (Ochnaceae) <ul style="list-style-type: none"><li>• Endemic</li></ul>                                      |                                          |

|                                                                                                                                       |  |                                                                                      |                                    |
|---------------------------------------------------------------------------------------------------------------------------------------|--|--------------------------------------------------------------------------------------|------------------------------------|
| <p><i>Psidium cattleianum</i><br/>Sabine (Myrtaceae)</p> <ul style="list-style-type: none"> <li>• Invasive</li> </ul>                 |  |    |                                    |
| <p><i>Pittosporum senacia</i> Putt.<br/>(Pittosporaceae)</p> <ul style="list-style-type: none"> <li>• Native</li> </ul>               |  |   |                                    |
| <p><i>Syzygium coriaceum</i><br/>Bossé &amp; J. Guého<br/>(Myrtaceae)</p> <ul style="list-style-type: none"> <li>• Endemic</li> </ul> |  |  | <p>(Photo credit: Mario Allet)</p> |



*Sideroxylon puberulum*  
C.DC. (Sapotaceae)

- Endemic

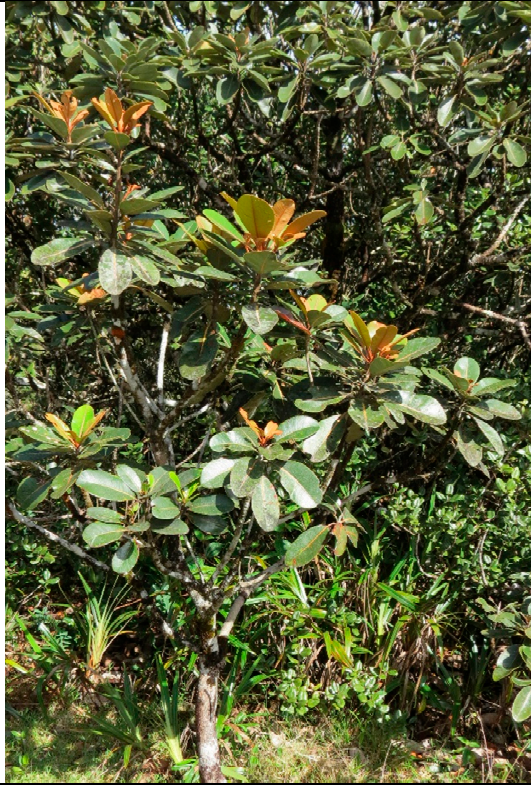

*Tambourissa peltata*  
Baker (Monimiaceae)

- Endemic

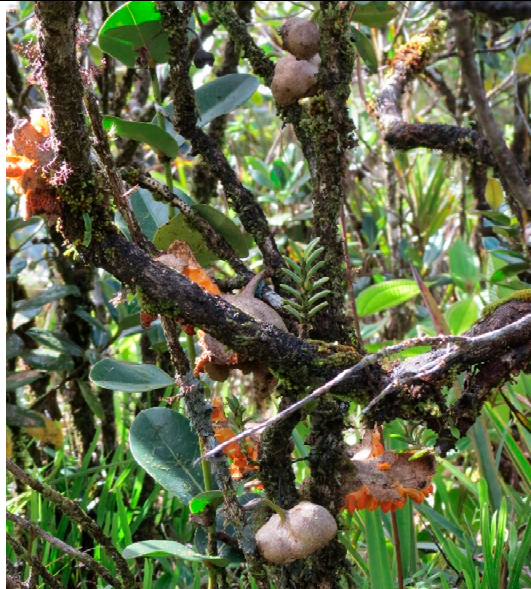

*Turraea rigida* Vent.  
(Meliaceae)

- Endemic

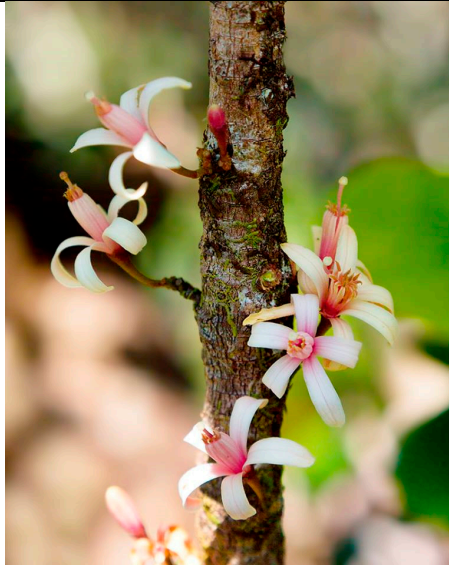

(Photo credit: Pritesh Chooramun)

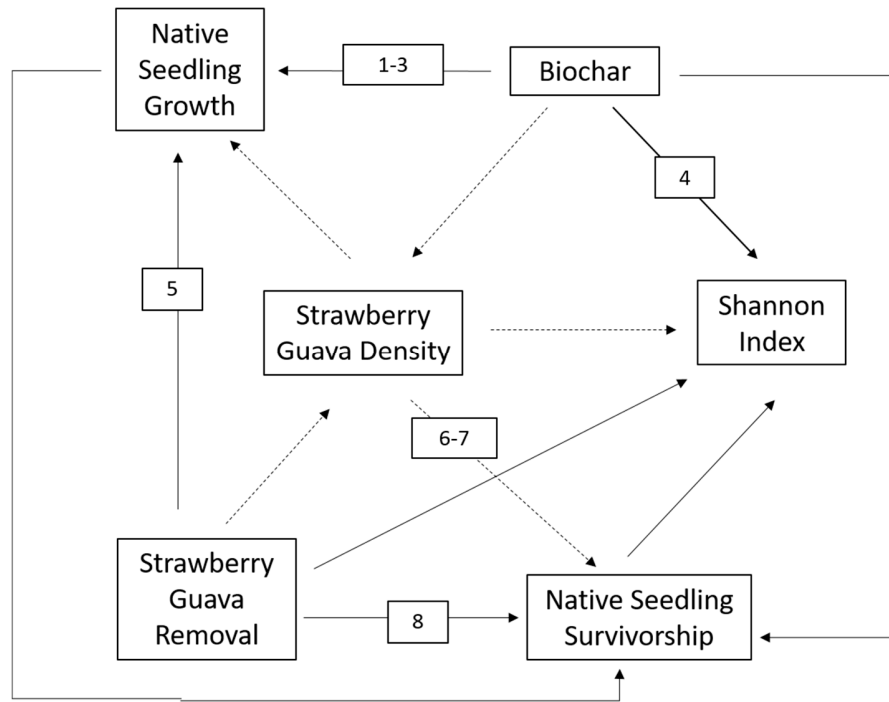

**Figure S2.** A priori structural equation model of hypothesized pathways between treatment type and measured response variables. The proposed pathways demonstrate how treatment type can influence each response variable in the experiment; pathways are based on preliminary data analysis and literature which has demonstrated an effect of each relationship. Positive effects are denoted by a solid line and negative effects by a dashed line. Where applicable, supporting references for the relationships are denoted by a path number.

## References

1. Sujeen, L.; Thomas, S.C. Potential of biochar to mitigate allelopathic effects in tropical island invasive plants: evidence from seed germination trials. *Trop. Conserv. Sci.* **2017**, *10*, 194008291769726, doi:10.1177/1940082917697264.
2. Pluchon, N.; Gundale, M.J.; Nilsson, M.-C.; Kardol, P.; Wardle, D.A. Stimulation of boreal tree seedling growth by wood-derived charcoal: effects of charcoal properties, seedling species and soil fertility. *Funct. Ecol.* **2014**, *28*, 766–775, doi:10.1111/1365-2435.12221.
3. Thomas, S.C.; Gale, N. Biochar and forest restoration: a review and meta-analysis of tree growth responses. *New For.* **2015**, *46*, 931–946, doi:10.1007/s11056-015-9491-7.
4. Drake, J.A.; Carrucan, A.; Jackson, W.R.; Cavagnaro, T.R.; Patti, A.F. Biochar application during reforestation alters species present and soil chemistry. *Sci. Total Environ.* **2015**, *514*, 359–365, doi:10.1016/j.scitotenv.2015.02.012.
5. Monty, M.L.F.; Florens, F.B.V.; Baider, C. Invasive alien plants elicit reduced production of flowers and fruits in various native forest species on the tropical island of Mauritius (Mascarenes, Indian Ocean). *Trop. Conserv. Sci.* **2013**, *6*, 35–49, doi:10.1177/194008291300600107.
6. Grace, J.B., and Bollen, K.A. Interpreting the results from multiple regression and structural equation models. *Bull. Ecol. Soc. Am.* **2005**, *86*, 283–295, doi:10.1890/0012-9623(2005)86[283:ITRFMR]2.0.CO;2.
7. Greene, B.T.; Blossey, B. Lost in the weeds: *Ligustrum sinense* reduces native plant growth and survival. *Biol. Invasions* **2012**, *14*, 139–150, doi:10.1007/s10530-011-9990-1.
8. Baider, C.; Florens, F.B.V. Control of invasive alien weeds averts imminent plant extinction. *Biol. Invasions* **2011**, *13*, 2641–2646, doi:10.1007/s10530-011-9980-3.
